# Supplementary material
Source: JCI journal article supplement (doi:10.1172/jci192146)
Supplement: sd1 [file 1]

# Hyperglycemia-induced P300/CBP acetyltransferase drives ZEB2-mediated pro-inflammatory macrophages and delays wound healing

Soumyajit Roy<sup>1</sup>, Debarun Patra<sup>1,2</sup>, Palla Ramprasad<sup>1</sup>, Shivam Sharma<sup>3</sup>, Parul Katiyar<sup>4</sup>, Ashvind Bawa<sup>5</sup>, Kanhaiya Singh<sup>4</sup>, Kulbhushan Tikoo<sup>3</sup>, Suman Dasgupta<sup>6</sup>, Chandan K Sen<sup>4</sup>, Durba Pal<sup>1,4\*</sup>

<sup>1</sup> Department of Biomedical Engineering, Indian Institute of Technology Ropar, Rupnagar, Punjab, India

<sup>2</sup> Stanford Cardiovascular Institute, Stanford University School of Medicine, Stanford, CA, USA

<sup>3</sup> Department of Pharmacology and Toxicology, National Institute of Pharmaceutical Education and Research, S.A.S. Nagar, Punjab, India

<sup>4</sup> Department of Surgery, McGowan Institute for Regenerative Medicine, University of Pittsburgh School of Medicine, 450 Technology Drive, Pittsburgh, PA, USA

<sup>5</sup> Department of General Surgery, Dayanand Medical College & Hospital, Ludhiana, Punjab, India

<sup>6</sup> Department of Molecular Biology and Biotechnology, Tezpur University, Napaam, Sonitpur, Assam, India

\*Corresponding authors: Durba Pal; E-mail: [durba.pal@iitrpr.ac.in](mailto:durba.pal@iitrpr.ac.in)

Department of Biomedical Engineering, S. S. Bhatnagar Block,  
Indian Institute of Technology Ropar,

Rupnagar-140001, Punjab, India

ORCID: 0000-0001-7672-3529, Ph: (+91) 01881-23-2506

Supplemental Figures

# Figure S1

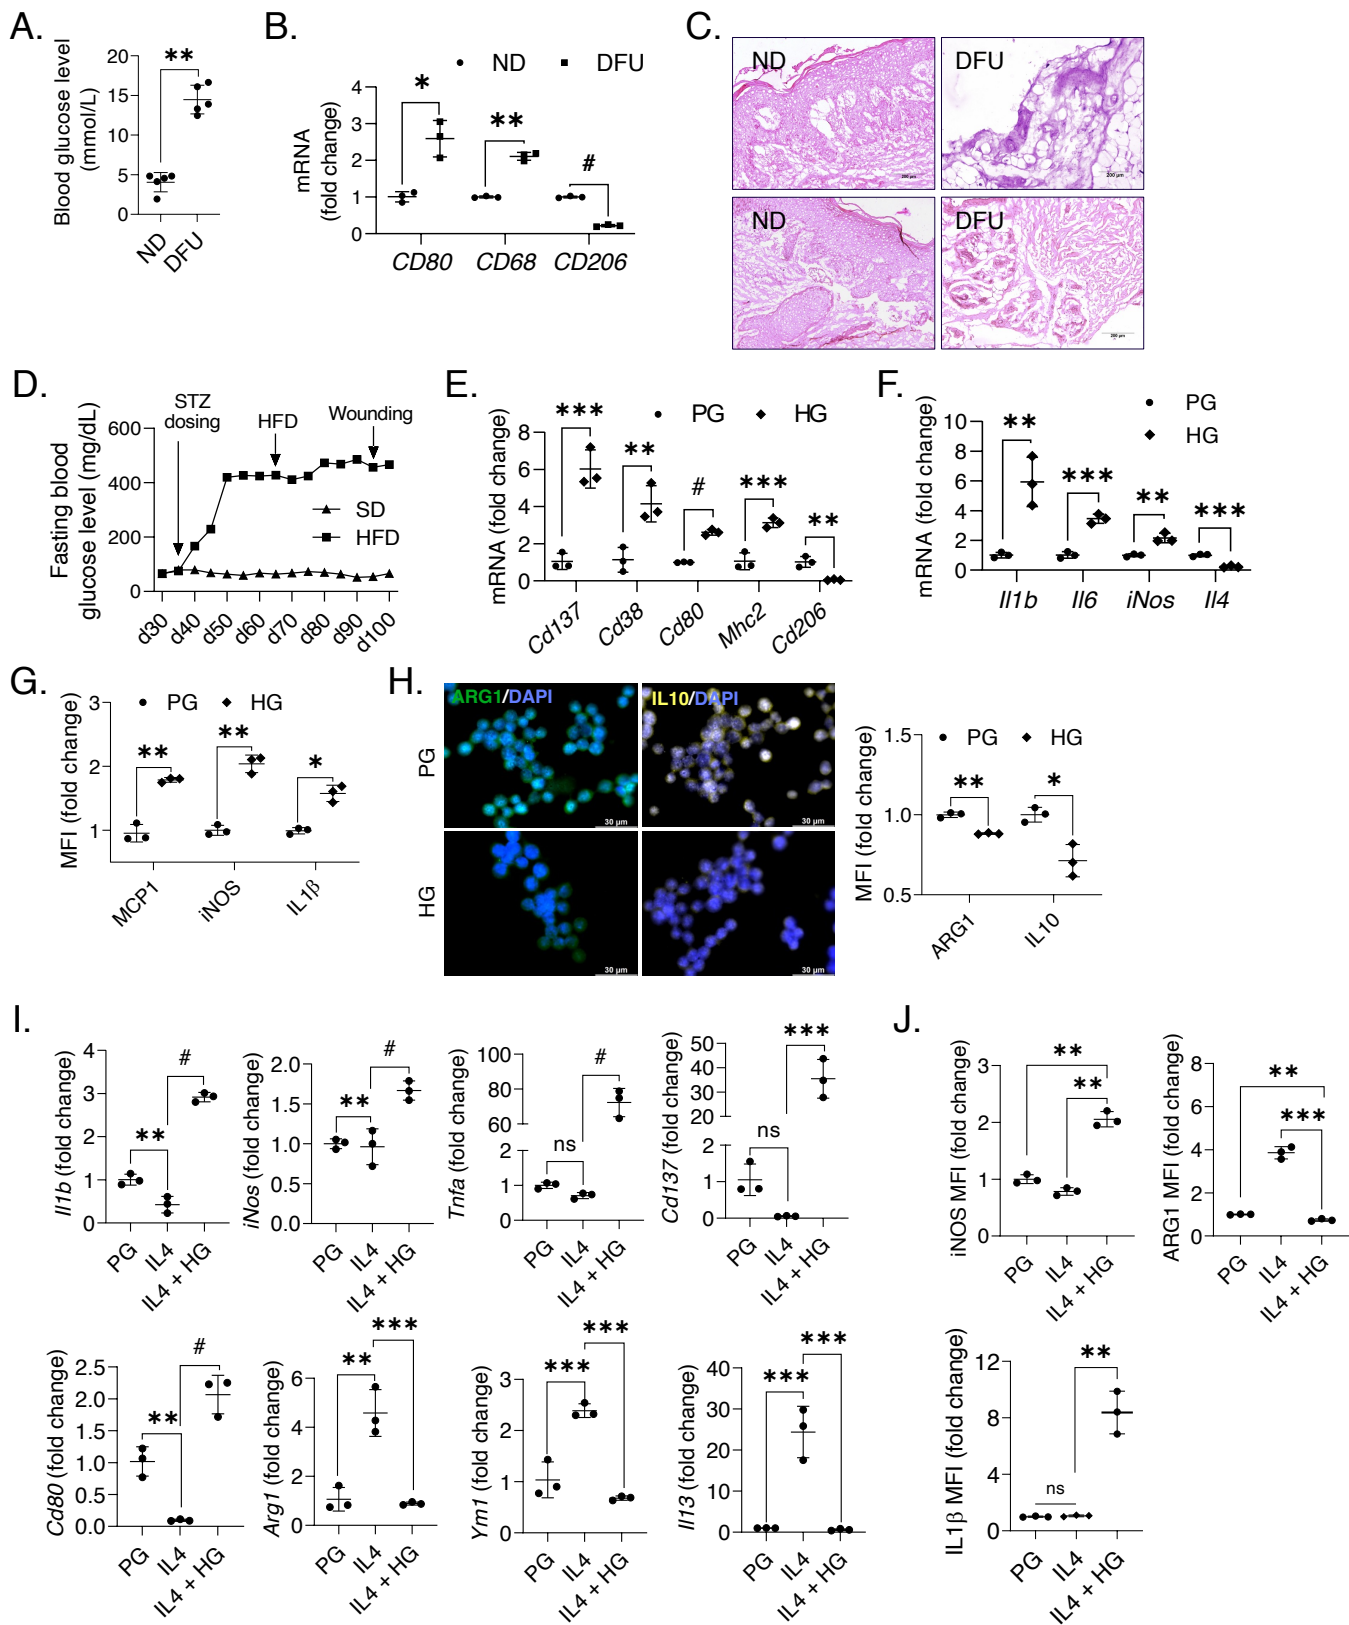

**Figure S1.** (A) Fasting blood glucose levels are elevated in diabetic subjects compared to non-diabetic individuals. (B) Gene expression assessment demonstrates significant overexpression of pro-inflammatory mediators in wound-resident macrophages of diabetic patients. (C) Histological analysis of wound areas of non-diabetic and diabetic patients' wound tissue samples (scale 200  $\mu\text{m}$ ;  $n=3/\text{group}$ ). (D) Fasting blood glucose level of SD and HFD mice ( $n=3/\text{group}$ ). mRNA expression profile of (E) cellular markers and (F) cytokines in PG and HG treated murine macrophages. (G) Measurement of fluorescence intensity for MCP1, iNOS, and IL1 $\beta$  in PG and HG treated macrophages (scale 30  $\mu\text{m}$ ;  $n=3$ ). (H) Representative Immunofluorescence images and analysis of ARG1 and IL10 expression in HG (25 mM D-glucose) treated RAW264.7 cells, (scale 30  $\mu\text{m}$ ;  $n=3$ ). (I) Relative mRNA expression of inflammatory markers in PG, IL4, IL4 + HG treated RAW264.7 cells. (J) Measurement of fluorescence intensity for iNOS, ARG1, and IL1 $\beta$  in PG, IL4, and IL4+HG treated macrophages. Data are expressed as means  $\pm$  SD; \* $P<0.05$ , \*\* $P<0.01$ , \*\*\* $P<0.001$ , # $P<0.0001$  were considered significant difference and ns indicates non-significant. ND, non-diabetic; DFU, diabetic foot ulcer; SD, standard diet; HFD, high fat diet; PG, physiological glucose level, HG, hyperglycemia.

# Figure S2

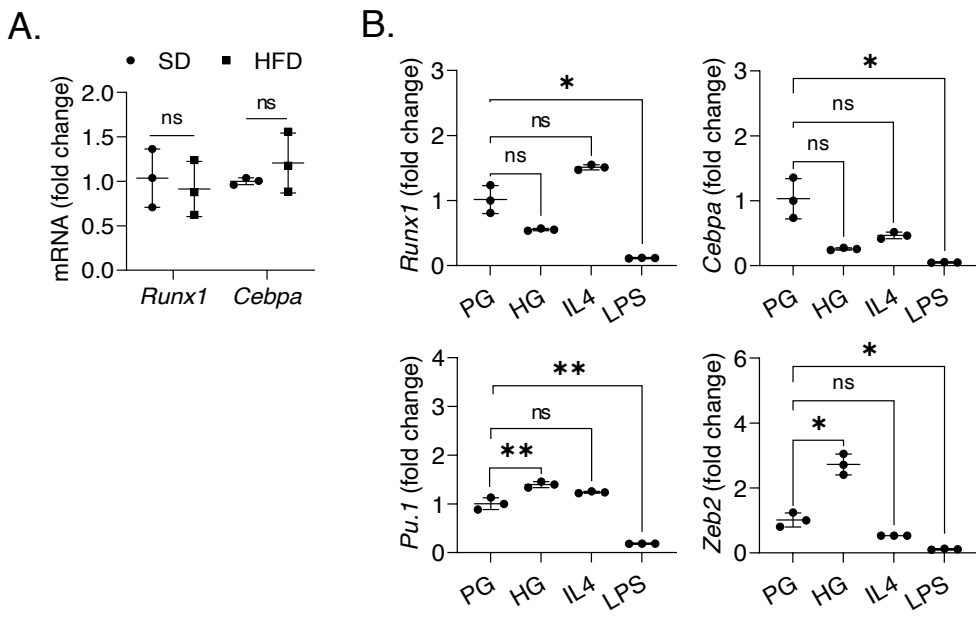

**Figure S2.** (A) Relative mRNA expression of macrophage specific markers in SD and HFD fed mice wound tissue macrophages. (B) Relative mRNA expression of macrophage specific markers in PG, HG, IL4, LPS treated RAW264.7 cells. Data are expressed as means  $\pm$  SD; \* $P$ <0.05, \*\* $P$ <0.01, \*\*\* $P$ <0.001, # $P$ <0.0001 were considered significant difference and ns indicates non-significant. ND, non-diabetic; DFU, diabetic foot ulcer; SD, standard diet; HFD, high fat diet; PG, physiological glucose level, HG, hyperglycemia.

# Figure S3

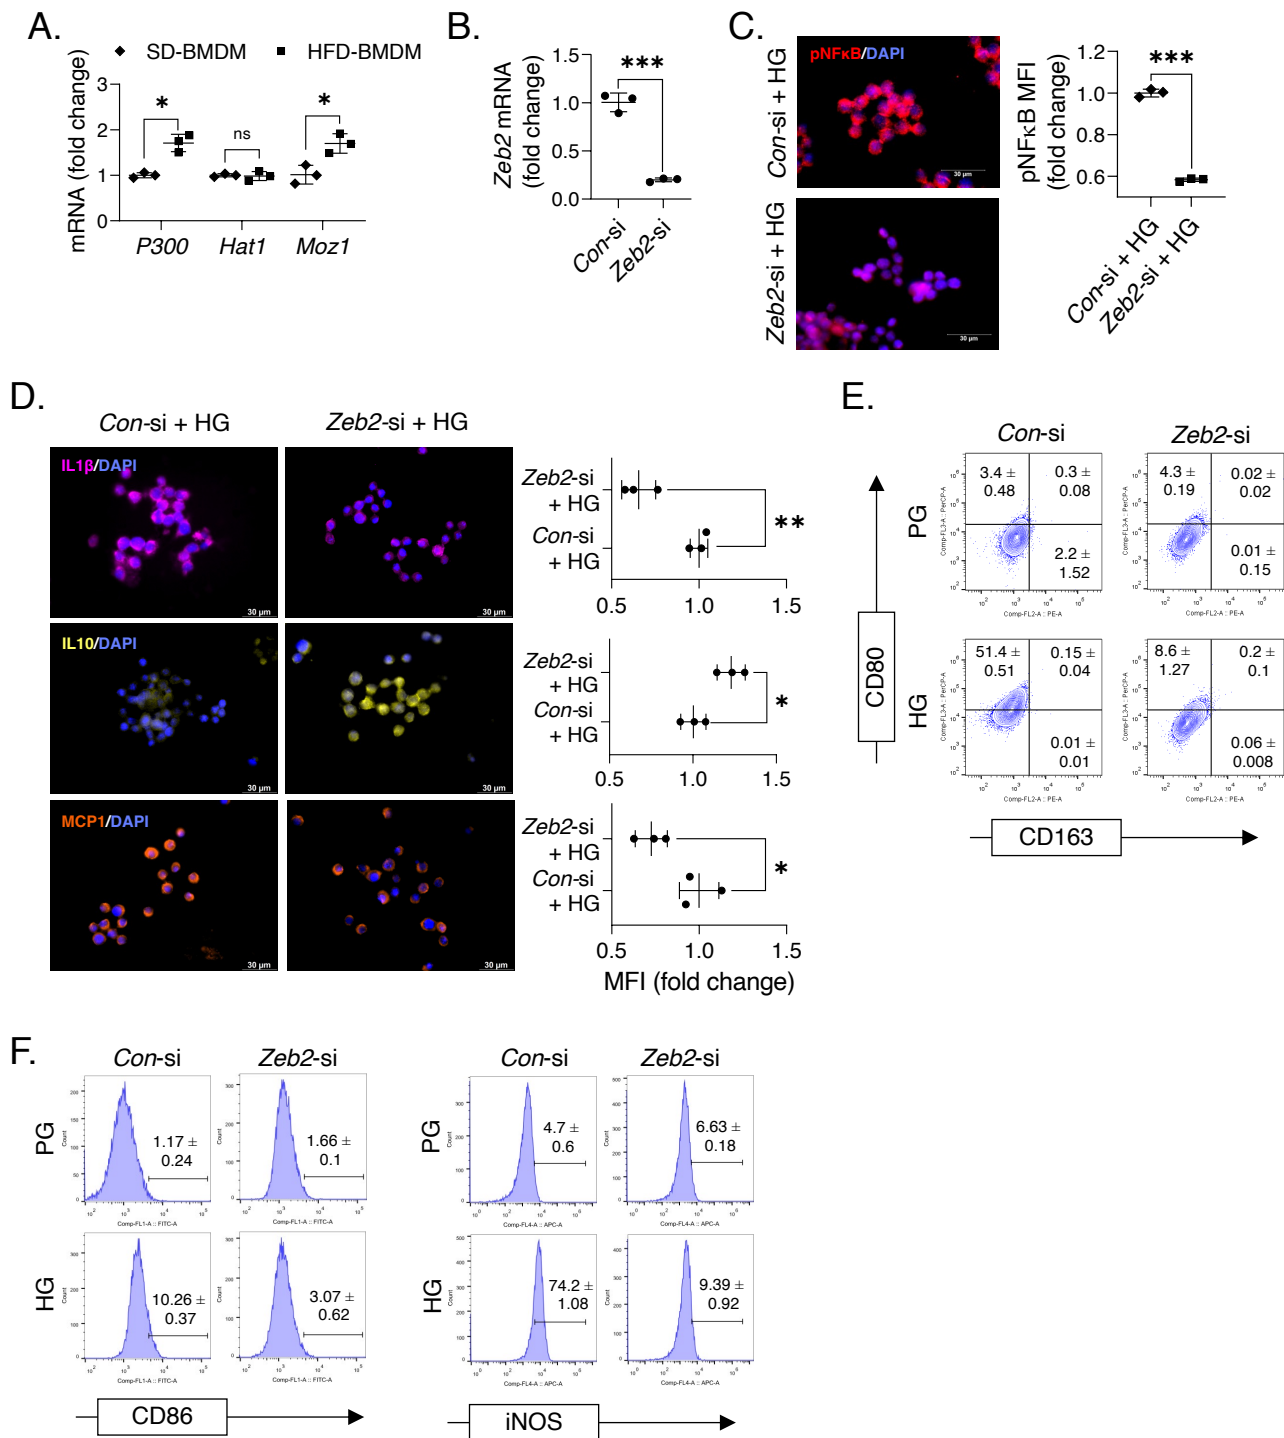

**Figure S3.** (A) mRNA expression profile of acetylation enzyme-related protein in BMDM (Bone Marrow Derived Macrophage) isolated from SD and HFD fed mice. (B) *Zeb2* mRNA expression profile in RAW264.7 macrophages after transfecting *Zeb2*-siRNA. (C) Immunofluorescence images and analysis of pNFκB in *Zeb2* silenced HG cells (scale 30 μm; n=3). (D) Expression of inflammatory cytokines in *Con-si* and *Zeb2-si* transfected HG RAW264.7 cells (scale 30 μm; n=3). Flow cytometry analysis of cell surface markers (E) CD80, CD163, and (F) CD86, iNOS in *Con-si* and *Zeb2-si* transfected PG and HG cells. Data are expressed as means ± SD; \* $P < 0.05$ , \*\* $P < 0.01$ , \*\*\* $P < 0.001$ , # $P < 0.0001$  were considered significant difference and ns indicates non-significant. SD, standard diet; HFD, high fat diet; PG, physiological glucose level, HG, hyperglycemia.

# Figure S4

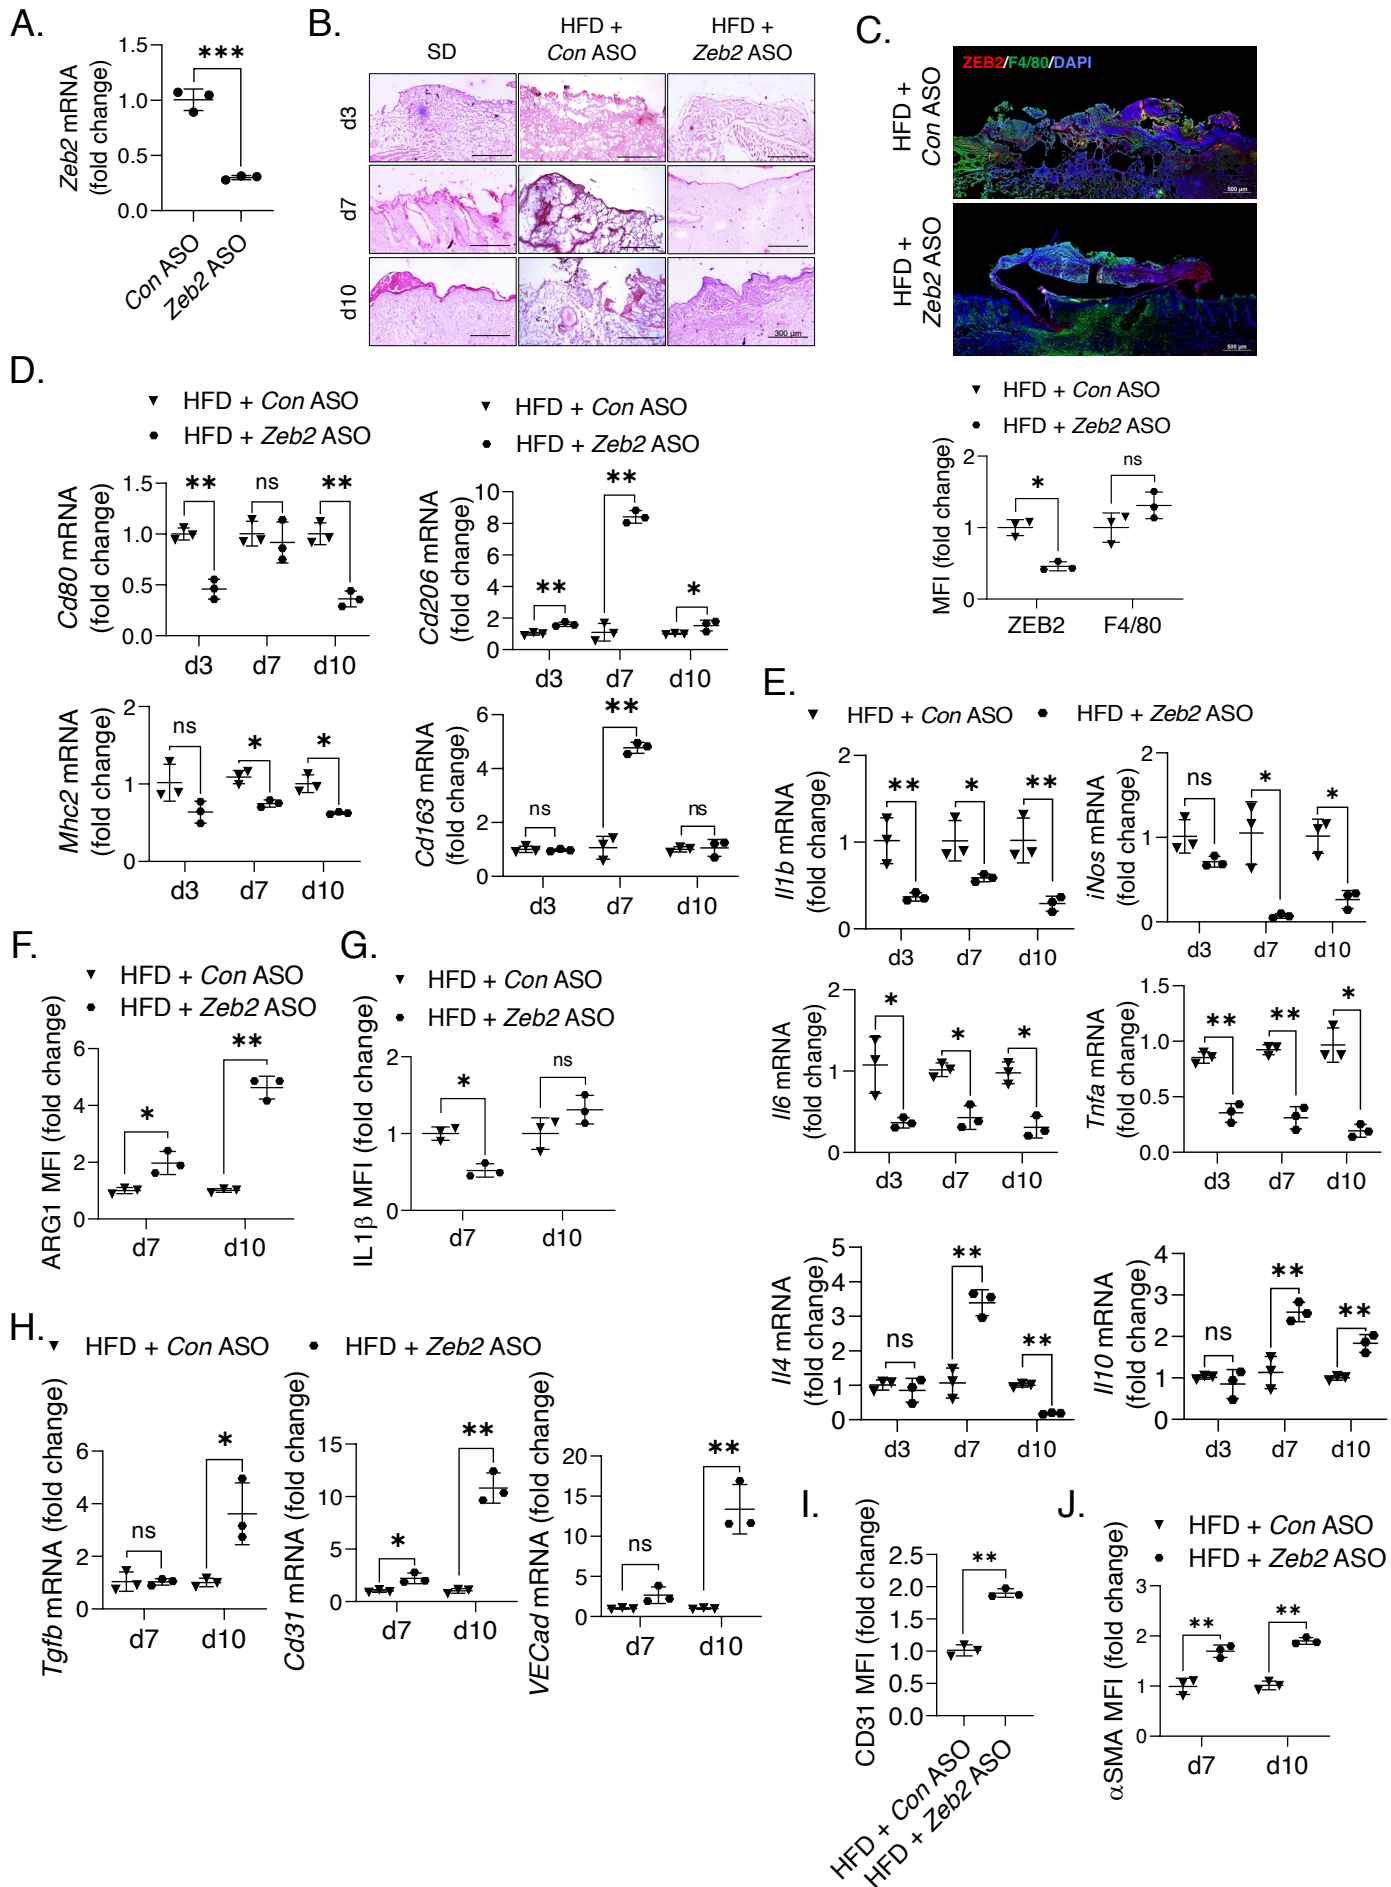

**Figure S4.** (A) *Zeb2* mRNA expression profile in RAW264.7 macrophages after transfecting *Zeb2*-ASO. (B) H&E images of wounds tissues at different time point in SD, HFD + *Con* ASO, and HFD + *Zeb2* ASO groups (scale 1000  $\mu\text{m}$ ,  $n=3/\text{group}$ ). (C) Immunostaining of mice wound tissue by ZEB2 (red), and F4/80 (green) antibody in HFD group treated with or without *Zeb2* ASO, (scale 500  $\mu\text{m}$ ,  $n=3/\text{group}$ ). Relative mRNA expression of (D) pro and anti-inflammatory cell surface markers, (E) pro and anti-inflammatory cytokines at different time point of wound tissue from HFD + *Con* ASO, and HFD + *Zeb2* ASO. Measurement of fluorescence intensity for (F) ARG1, and (G) IL1 $\beta$  in d7 and d10 mice wound tissue ( $n=3/\text{group}$ ). (H) Relative mRNA expression of angiogenesis markers at different time point of wound tissue from HFD + *Con* ASO, and HFD + *Zeb2* ASO. Measurement of fluorescence intensity for (I) CD31 in d7, and (J)  $\alpha\text{SMA}$  in d7 and d10 mice wound tissue ( $n=3/\text{group}$ ). Data are expressed as means  $\pm$  SD; \* $P<0.05$ , \*\* $P<0.01$ , \*\*\* $P<0.001$ , # $P<0.0001$  were considered significant difference and ns indicates non-significant. SD, standard diet; HFD, high fat diet.

# Figure S5

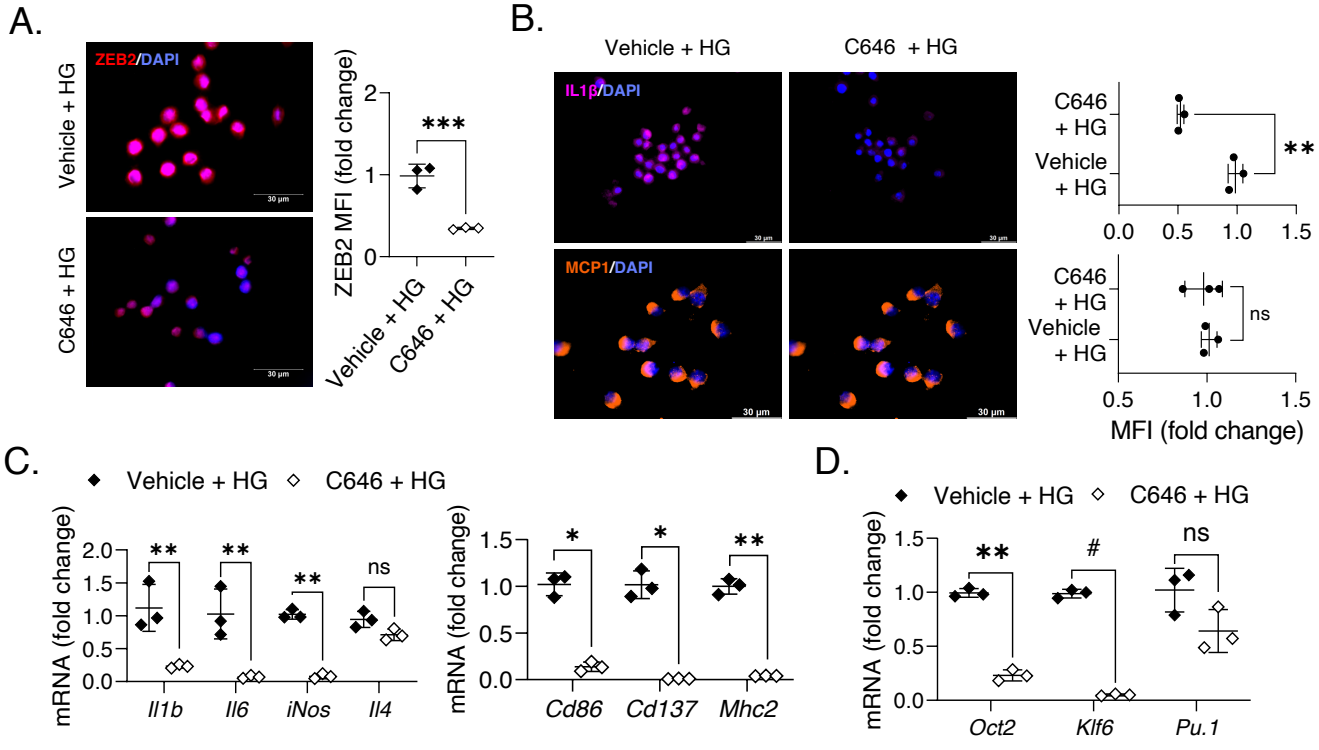

**Figure S5.** Representative image and analysis of immunostaining for (A) ZEB2 and (B) pro-inflammatory cytokines in C646 incubated HG treated RAW264.7 (scale 30 μm; n=3). Relative mRNA expression of (C) cell surface markers, cytokines, and (D) MLDTFs in HG treated cells incubated with or without C646. Data are expressed as means ± SD; \* $P < 0.05$ , \*\* $P < 0.01$ , \*\*\* $P < 0.001$ , # $P < 0.0001$  were considered significant difference and ns indicates non-significant. PG, physiological glucose level, HG, hyperglycemia.

# Figure S6

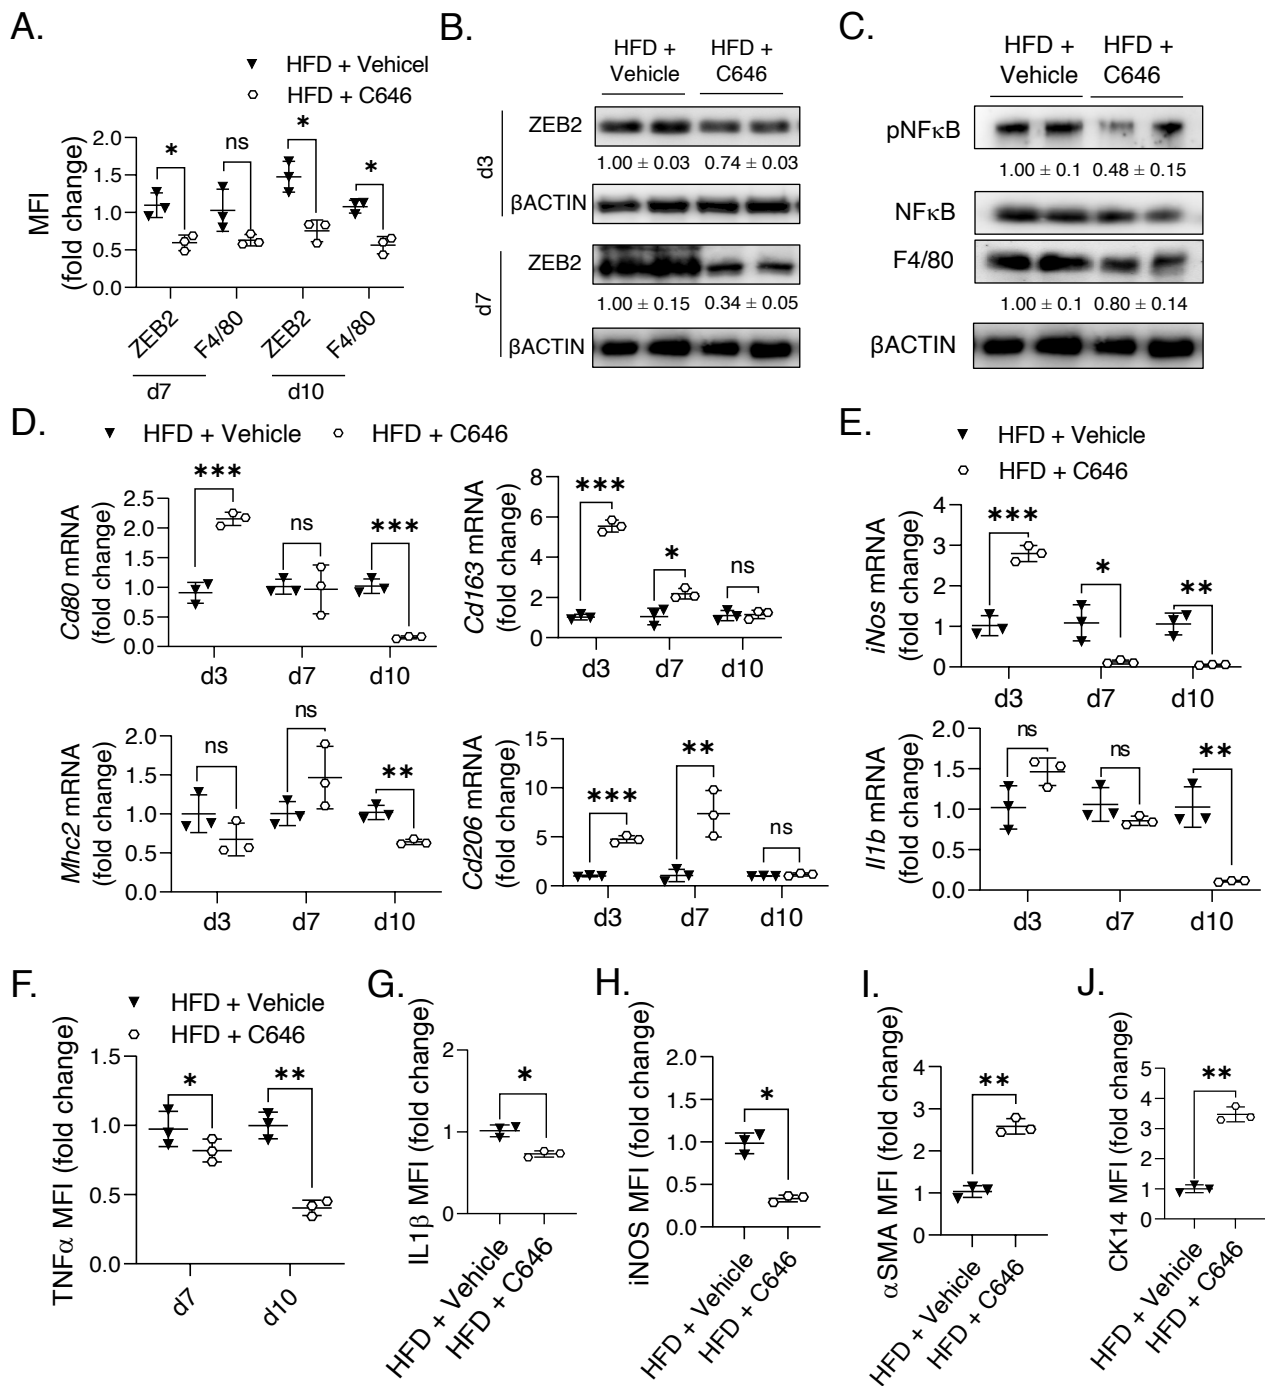

**Figure S6.** (A) Measurement of fluorescence intensity analysis for ZEB2, and F4/80 in d7 and d10 mice wound tissue (n=3/group). Expression of (B) ZEB2 at d3, d7 wound tissue, and (C) pNFκB, F4/80 at d10 wound tissue of HFD fed mice wound tissue treated with or without C646 (n=4/group). Relative mRNA expression of (D) cell surface markers, and (E) cytokines at different time points of HFD fed mice wound tissue treated with or without C646. (F) Measurement of fluorescence intensity analysis for TNFα in d7 and d10 mice wound tissue (n=3/group). Measurement of fluorescence intensity for (G) IL1β in d7, (H) iNOS in d10, (I) αSMA in d7, and (J) CK14 in d10 mice wound tissue. Data are expressed as means ± SD; \*P<0.05, \*\*P<0.01, \*\*\*P<0.001, #P<0.0001 were considered significant difference and ns indicates non-significant. SD, standard diet; HFD, high fat diet.

# Hyperglycemia-induced P300/CBP acetyltransferase drives ZEB2-mediated pro-inflammatory macrophages and delays wound healing

Soumyajit Roy<sup>1</sup>, Debarun Patra<sup>1,2</sup>, Palla Ramprasad<sup>1</sup>, Shivam Sharma<sup>3</sup>, Parul Katiyar<sup>4</sup>, Ashvind Bawa<sup>5</sup>, Kanhaiya Singh<sup>4</sup>, Kulbhushan Tikoo<sup>3</sup>, Suman Dasgupta<sup>6</sup>, Chandan K Sen<sup>4</sup>, Durba Pal<sup>1,4\*</sup>

<sup>1</sup> Department of Biomedical Engineering, Indian Institute of Technology Ropar, Rupnagar, Punjab, India

<sup>2</sup> Stanford Cardiovascular Institute, Stanford University School of Medicine, Stanford, CA, USA

<sup>3</sup> Department of Pharmacology and Toxicology, National Institute of Pharmaceutical Education and Research, S.A.S. Nagar, Punjab, India

<sup>4</sup> Department of Surgery, McGowan Institute for Regenerative Medicine, University of Pittsburgh School of Medicine, 450 Technology Drive, Pittsburgh, PA, USA

<sup>5</sup> Department of General Surgery, Dayanand Medical College & Hospital, Ludhiana, Punjab, India

<sup>6</sup> Department of Molecular Biology and Biotechnology, Tezpur University, Napaam, Sonitpur, Assam, India

\*Corresponding authors: Durba Pal; E-mail: [durba.pal@iitrpr.ac.in](mailto:durba.pal@iitrpr.ac.in)

Department of Biomedical Engineering, S. S. Bhatnagar Block,  
Indian Institute of Technology Ropar,

Rupnagar-140001, Punjab, India

ORCID: 0000-0001-7672-3529, Ph: (+91) 01881-23-2506

Supplementary file

**Table A: Patient demographic details**

| <b>Pathological features</b>   |                               |
|--------------------------------|-------------------------------|
| Non-diabetic patients:         |                               |
| Number of patients             | 6                             |
| Age (median range)             | 53 ± 6.4                      |
| Gender                         | Male (n = 4), Female (n = 2)  |
| BMI (median range)             | 22.16 ± 1.91                  |
| Fasting serum glucose (mmol/L) | 4.0547 ± 1.21                 |
|                                |                               |
| Diabetic patients              |                               |
| Number of patients             | 18                            |
| Age (median range)             | 56.75 ± 5.53                  |
| Gender                         | Male (n = 14), Female (n = 4) |
| BMI (median range)             | 28.725 ± 5.71                 |
| Fasting serum glucose (mmol/L) | 11.68624 ± 5.61               |
|                                |                               |

**Table B: List of antibodies used**

| <b>Antibody</b>                                 | <b>Dilution</b>                                 | <b>Company</b>            | <b>Catalog No.</b> |
|-------------------------------------------------|-------------------------------------------------|---------------------------|--------------------|
| Phospho-NFκBp65 (S-536)                         | 1:1000 for ICC<br>1:2000 for WB                 | Abcam                     | #ab86299           |
| Total NFκB                                      | 1:1000 for WB                                   | Invitrogen                | #PA1-186           |
| iNOS                                            | 1:400 for ICC<br>1:400 for IHC<br>1:1500 for FC | Cell Signaling Technology | #13120             |
| Arginase 1                                      | 1:50 for ICC<br>1:400 for IHC                   | Cell Signaling Technology | #93668             |
| F4/80                                           | 1:50 for IHC                                    | Santa Cruz Biotechnology  | #sc-377009         |
| CD68                                            | 1 µg/mL for IHC                                 | Abcam                     | #ab125212          |
| βACTIN                                          | 1:1000 for WB                                   | Invitrogen                | #AM4302            |
| ZEB2                                            | 1:100 for IHC                                   | Santa Cruz Biotechnology  | #sc-271984         |
| CD80                                            | 1 µg/mL for IHC                                 | Abcam                     | #ab254579          |
| CD163                                           | 1 µg/mL for IHC                                 | Abcam                     | #ab182422          |
| OCT2                                            | 1:200 for ICC                                   | Cloud clone               | #PAB554Hu01        |
| HAT1                                            | 1:200 for ICC                                   | Cloud clone               | #PAB952Mu01        |
| P300                                            | 1:200 for ICC                                   | Abclonal                  | #A13016            |
| IL1β                                            | 1:200 for ICC                                   | Cell Signaling Technology | #12703T            |
| TNFα                                            | 1:100 for ICC                                   | Cell Signaling Technology | #11948T            |
| MCP1                                            | 1:50 for IHC                                    | Santa Cruz Biotechnology  | #sc-52701          |
| Anti-Mouse IgG<br>(Alexa Fluor 488 conjugated)  | 1:1000 for ICC<br>1:1000 for IHC                | Cell Signaling Technology | #4408              |
| Anti-Rabbit IgG<br>(Alexa Fluor 488 conjugated) | 5 µg/mL for ICC<br>1:500 for IHC                | Invitrogen                | #A-11034           |
| HRP conjugated Anti-Mouse<br>IgG antibody       | 1:20000 for WB                                  | Sigma-Aldrich             | #A9044             |
| HRP conjugated Anti-Rabbit<br>IgG antibody      | 1:20000 for WB                                  | Sigma-Aldrich             | #A9169             |
| TruStainFcXTM (anti-mouse CD16/32)              | 0.1 µg/million<br>cells for FC                  | BioLegend                 | #101319            |
| PE/Cy5 anti-mouse CD80                          | 5 µL/ million cells                             | BioLegend                 | #104712            |
| FITC anti-mouse CD86                            | 2 µL/ million cells                             | BioLegend                 | #105006            |
| APC anti-human CD163                            | 5 µL/million cells<br>for FC                    | BioLegend                 | #326510            |
| Acetyl-Histone H3 (Lys27) Antibody              | 1:20 for ChIP                                   | Cell Signaling Technology | #4353S             |
| Acetyl-Histone H3 (Lys9) (C5B11) Rabbit mAb     | 1:20 for ChIP                                   | Cell Signaling Technology | #9649S             |

**Table C: Primer sequences used**

| <b>Mouse primers</b> |                         |                        |
|----------------------|-------------------------|------------------------|
| <b>Gene</b>          | <b>Forward (5'-3')</b>  | <b>Reverse (5'-3')</b> |
| <i>Cd163</i>         | TGCTCAGGAAACCAATCCCA    | ACCTCCACTCTTCCAGCG     |
| <i>Cd206</i>         | TTCAGCTATTGGACGCGAGG    | GAATCTGACACCCAGCGGAA   |
| <i>Cd86</i>          | CTGTAGGCAGCACGGACTTG    | CATGGTGCATCTGGGGTCCAT  |
| <i>Mhc2</i>          | GAAGACGACATTGAGGCCGA    | GGAACACAGTCGCTTGAGGA   |
| <i>Il4</i>           | GCATGGCCCAGAAATCAAGG    | GAGAAATCGATGACAGCGCC   |
| <i>iNos</i>          | CTTGGTGAAGGGACTGAGCTG   | CGTTCTCCGTTCTCTTGCACT  |
| <i>bActin</i>        | GTACTIONTGTGTGGATCGGTGG | AGGGTGTAAAACGCAGCTCAG  |
| <i>Il6</i>           | GGGACTGATGCTGGTGACAA    | ACAGGTCTGTTGGGAGTGGT   |
| <i>Hat 1</i>         | TTTCGGTTACAAGGGCCTGA    | CAACATCATCTGCCTCCACAC  |
| <i>Moz1</i>          | CTGTCCAACCAGCCGCCAA     | GCTTCCAGACTCGGGTATCTCC |
| <i>Pu.1</i>          | GCAGGGGATCTGACCAACCT    | AGTCATCCGATGGAGGGGC    |
| <i>Zeb2</i>          | CCAGAGGAAACAAGGATTTTCAG | AGGCCTGACATGTAGTCTTGTG |
| <i>Oct2</i>          | AATGGACCCGACATTAACCA    | AAATGGTTCGTTTGGCTGAAG  |
| <i>Runx1</i>         | CACGCCAGTTCCTACTCTG     | AGGTAGGTGTGGTAGCGAGA   |
| <i>Cebpa</i>         | TACCGAGTAGGGGGAGCAAA    | TCATTTTTCTCACGGGGCCA   |
| <i>Klf6</i>          | AGCCTATCTTGCCGTCTTT     | CGCCTCGGGTTCATTTTC     |
| <b>Human primers</b> |                         |                        |
| <b>Gene</b>          | <b>Forward (5'-3')</b>  | <b>Reverse (5'-3')</b> |
| <i>P300</i>          | GGCTGTATCAGAGCGTATTGTC  | CCTCGAAATAAGGCAATTCC   |
| <i>ZEB2</i>          | CCAGAGGAAACAAGGATTTTCAG | AGGCCTGACATGTAGTCTTGTG |
| <i>CD80</i>          | CTCTTGGTGCTGGCTGGTCTTT  | GCCAGTAGATGCGAGTTTGTGC |
| <i>CD68</i>          | TACATGGCGGTGGAGTACAA    | AGGTGGACAGCTGGTCAAAG   |
| <i>OCT2</i>          | GCACCACCCACCAAATGTTC    | GCCTTCCCTTGAACCTCTCCC  |
| <i>CD163</i>         | GTAGCGGGAGAGTGGAAGTG    | TCCAAATGCGTCCAGAACCT   |
| <i>MOZ1</i>          | CTCATCTCCTGTGCCGACTG    | TTTGGCATACGGGTGAGTGG   |
| <i>HAT 1</i>         | TCGGAAATGGCGGGATTTGG    | CGGAACATTGTTGACAGGCT   |
| <i>KLF</i>           | AGGATCGAGGCTTGTGATGC    | GTAGCCCAAAAATGCCACC    |
| <i>BACTIN</i>        | ACAGAGCCTCGCCTTTGCC     | TCCCAGTTGGTGACGATGC    |

| siRNA and ASO                  |                                                           |
|--------------------------------|-----------------------------------------------------------|
| <i>Zeb2</i> siRNA (m)          | 5'-T*A*A* TACCT*TTG*GGTTCT*C*T*C -3'                      |
| <i>Con</i> ASO (non-targeting) | 5'- +T*+A*+G*C*C*T*G*T*C*A*C*T*T*+C*+T*+C -3'             |
| <i>Zeb2</i> ASO (m)            | 5'-+T*+A*+A* T*A*C*C*T*T*T*G*G*G*T*T*C*T*+C*+T*+C -3'     |
|                                |                                                           |
| siRNA and ASO                  |                                                           |
| <i>ZEB2</i> promoter           | FP- TGCGGAGACTTCAAGGTATAATC<br>RP- GACGTGTTACGCCTCTTCTAAT |
