# Supplementary material
Source: JCI journal article supplement (doi:10.1172/jci192146)
Supplement: sd2 [file 2]

# Hyperglycemia-induced P300/CBP acetyltransferase drives ZEB2-mediated pro-inflammatory macrophages and delays wound healing

Soumyajit Roy<sup>1</sup>, Debarun Patra<sup>1,2</sup>, Palla Ramprasad<sup>1</sup>, Shivam Sharma<sup>3</sup>, Parul Katiyar<sup>4</sup>, Ashvind Bawa<sup>5</sup>, Kanhaiya Singh<sup>4</sup>, Kulbhushan Tikoo<sup>3</sup>, Suman Dasgupta<sup>6</sup>, Chandan K Sen<sup>4</sup>, Durba Pal<sup>1,4\*</sup>

<sup>1</sup> Department of Biomedical Engineering, Indian Institute of Technology Ropar, Rupnagar, Punjab, India

<sup>2</sup> Stanford Cardiovascular Institute, Stanford University School of Medicine, Stanford, CA, USA

<sup>3</sup> Department of Pharmacology and Toxicology, National Institute of Pharmaceutical Education and Research, S.A.S. Nagar, Punjab, India

<sup>4</sup> Department of Surgery, McGowan Institute for Regenerative Medicine, University of Pittsburgh School of Medicine, 450 Technology Drive, Pittsburgh, PA, USA

<sup>5</sup> Department of General Surgery, Dayanand Medical College & Hospital, Ludhiana, Punjab, India

<sup>6</sup> Department of Molecular Biology and Biotechnology, Tezpur University, Napaam, Sonitpur, Assam, India

\*Corresponding authors: Durba Pal; E-mail: durba.pal@iitrpr.ac.in

Department of Biomedical Engineering, S. S. Bhatnagar Block,  
Indian Institute of Technology Ropar,

Rupnagar-140001, Punjab, India

ORCID: 0000-0001-7672-3529, Ph: (+91) 01881-23-2506

File for unedited western blot and gel

# Full unedited blot for Figure 1.B.

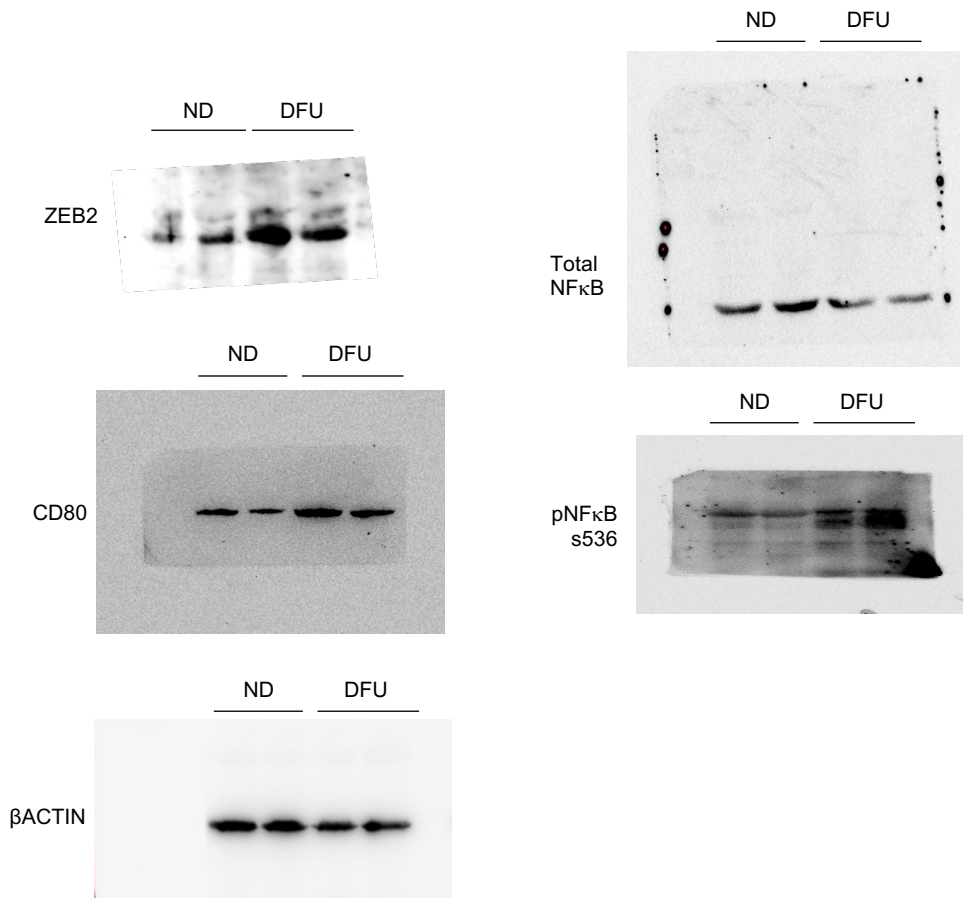

Immunoblotting images of ZEB2, CD80,  $\beta$ ACTIN, pNF $\kappa$ B s536, and total NF $\kappa$ B protein in wound tissue macrophages isolated from ND and DFU patients' wound samples. ND, non-diabetic; DFU, diabetic foot ulcer

Full unedited blot for Figure 1.D.

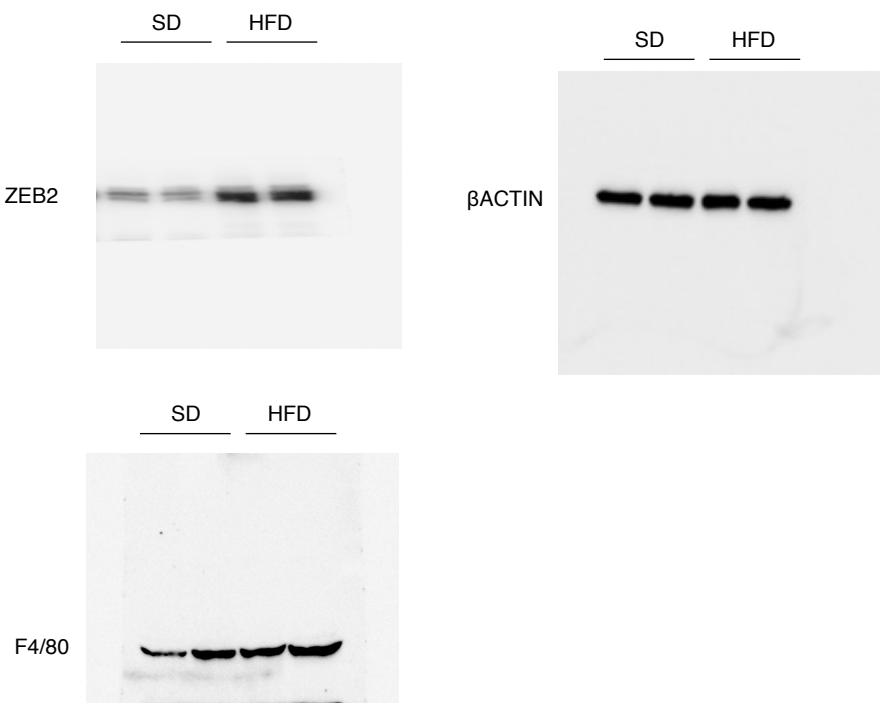

Immunoblotting images of ZEB2,  $\beta$ ACTIN, and F4/80 protein in SD and HFD mice wound tissue. SD, standard diet; HFD, high fat diet.

Full unedited blot for Figure 1.E.

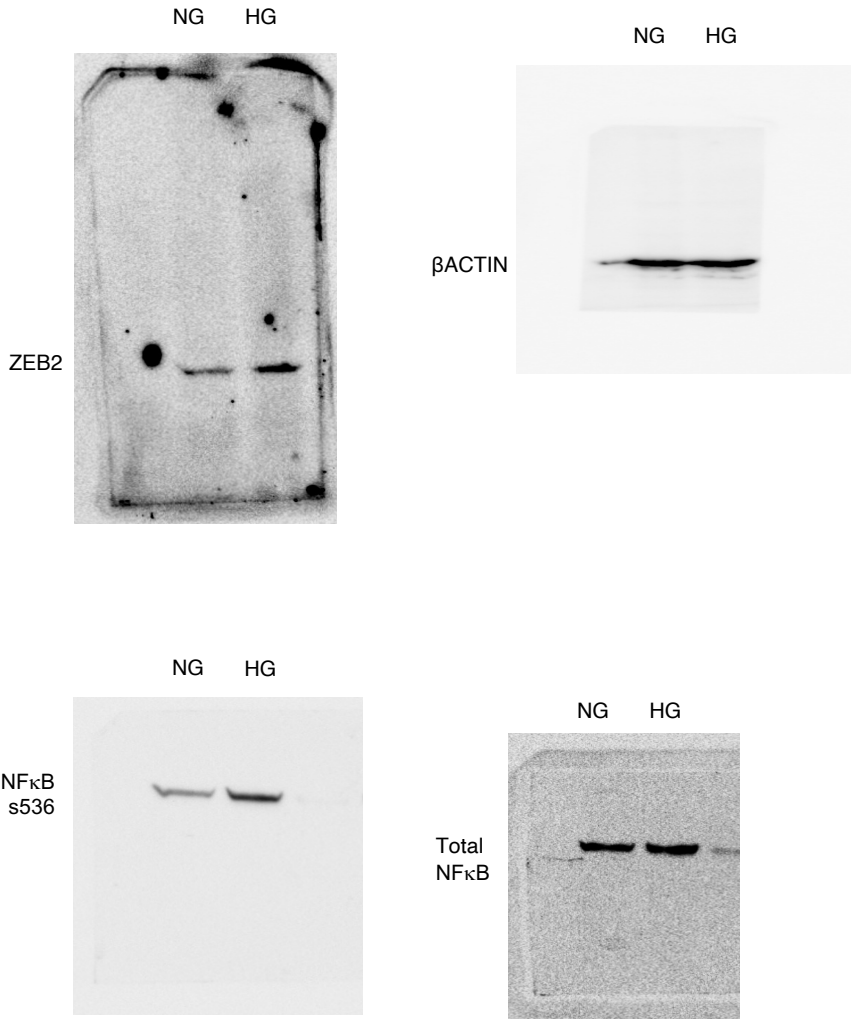

Immunoblotting images of ZEB2,  $\beta$ ACTIN, and pNF $\kappa$ B s536, and total NF $\kappa$ B protein in NG and HG treated Raw264.7 macrophages. NG, normoglycemia; HG, hyperglycemia.

# Full unedited blot for Figure 3.G.

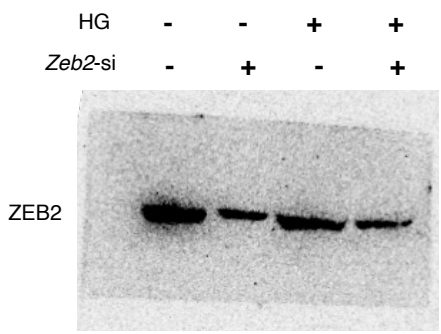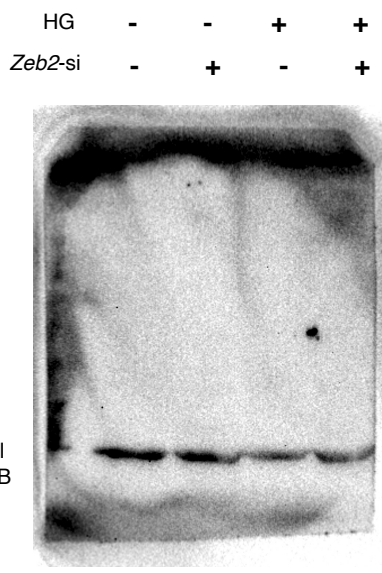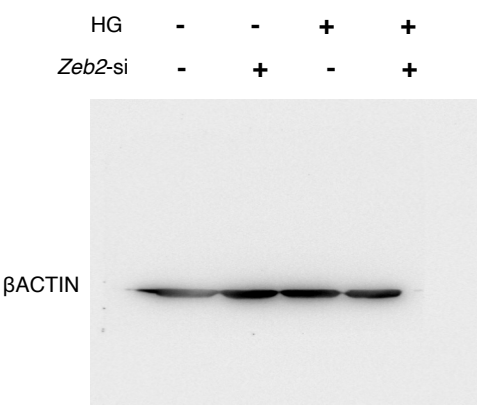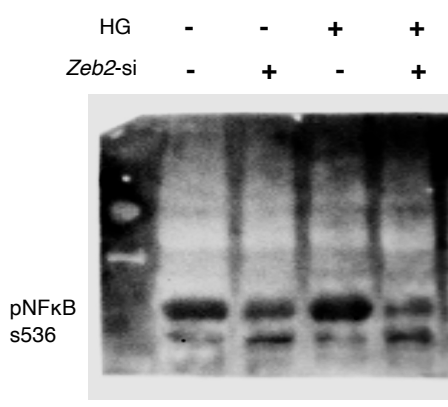

Immunoblotting images of ZEB2, βACTIN, pNFκB s536, and total NFκB protein in NG and HG Raw264.7 macrophages after with/ without Zeb2-si treatment. NG, normoglycemia; HG, hyperglycemia.

Full unedited blot for Figure 4.C.

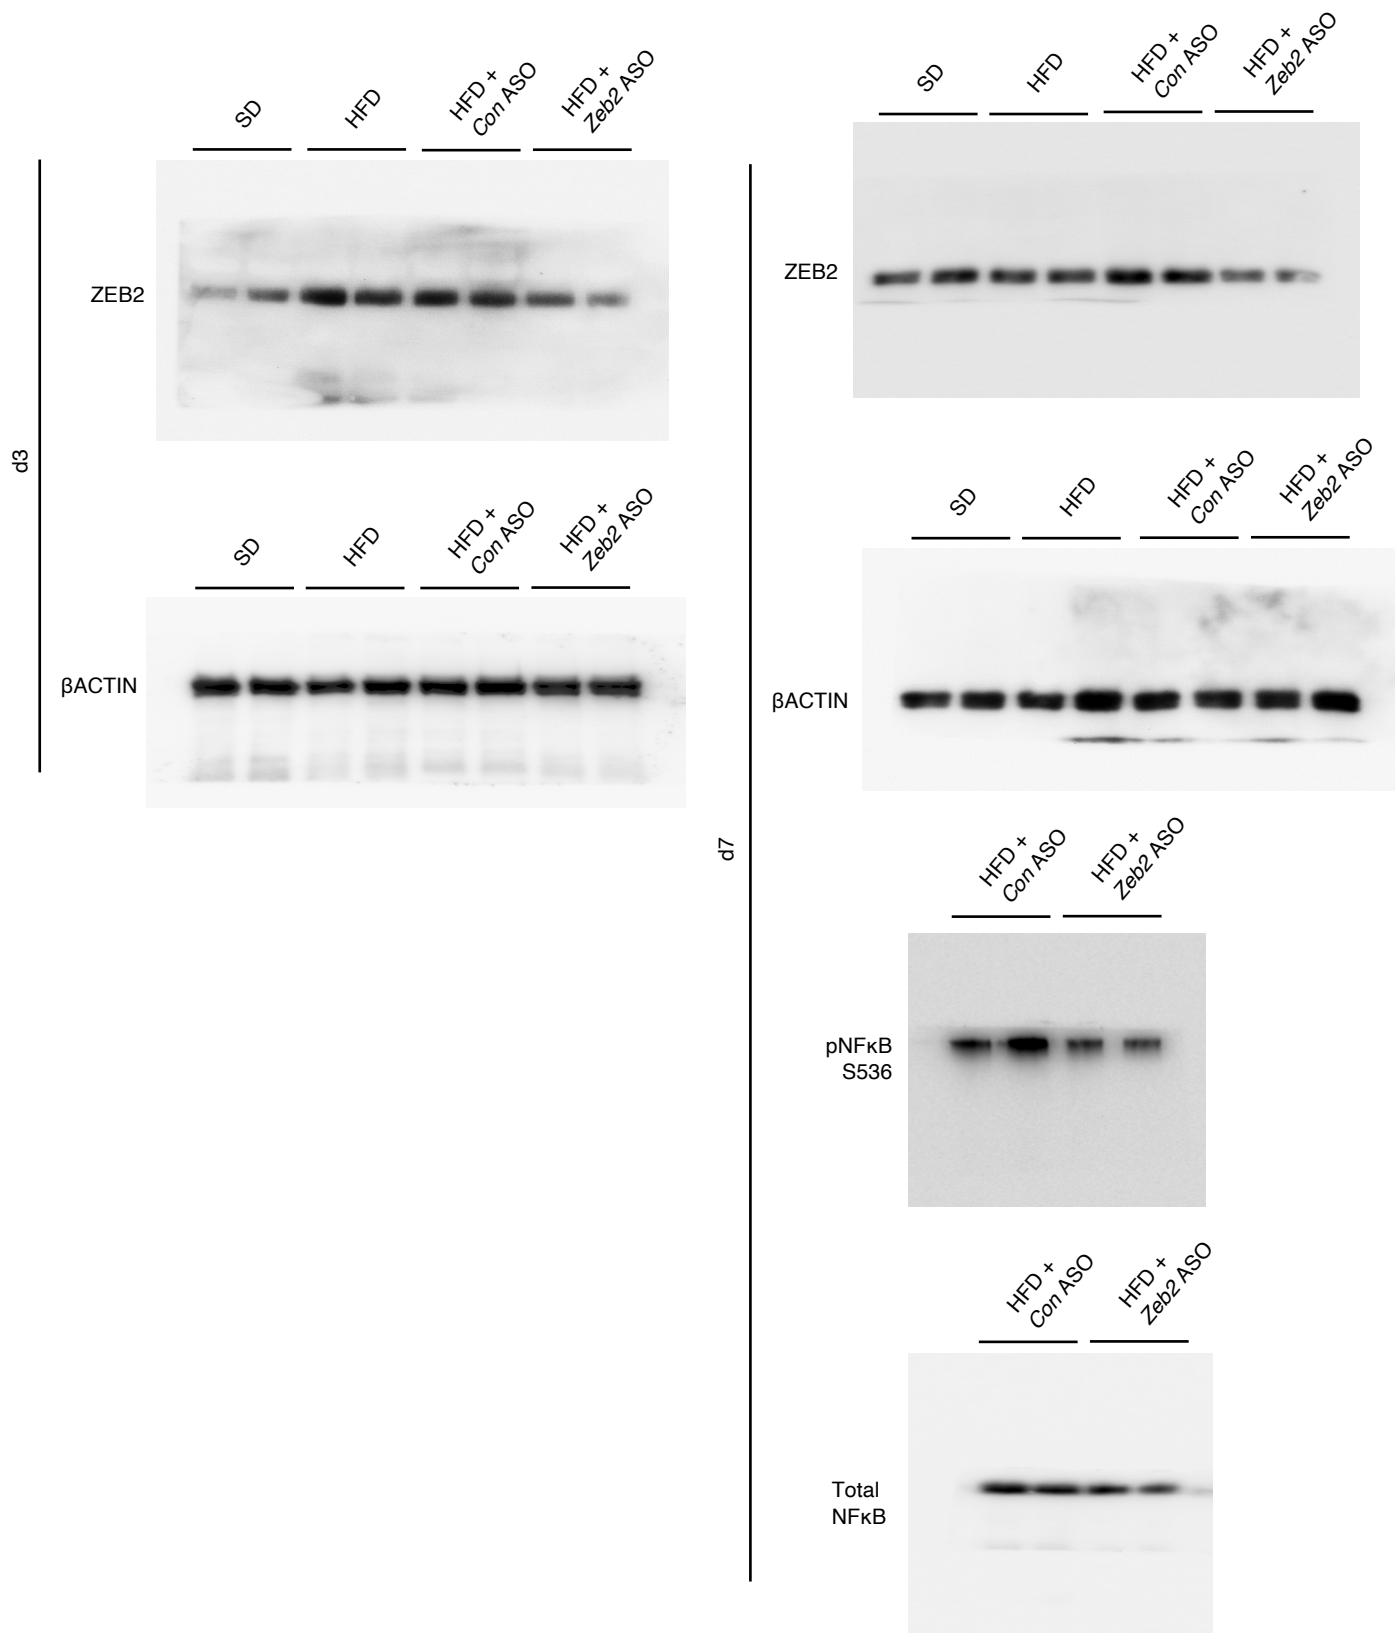

Immunoblotting images of ZEB2, βACTIN, pNFκB s536, and total NFκB protein in SD, HFD, HFD + *Con* ASO, and HFD + *Zeb2* ASO mice wound tissue at d3 and d7. SD, standard diet; HFD, high fat diet.

# Full unedited blot for Figure 5.B.

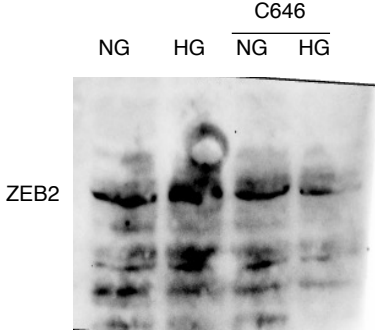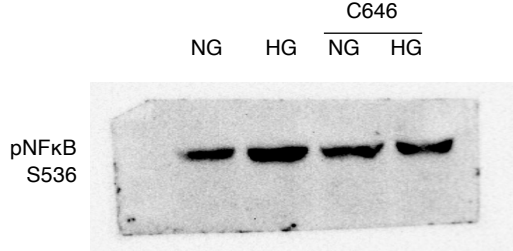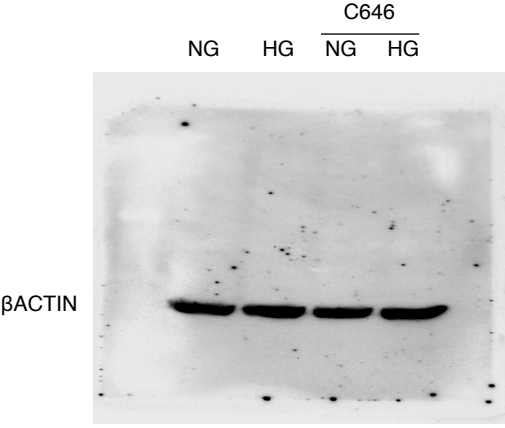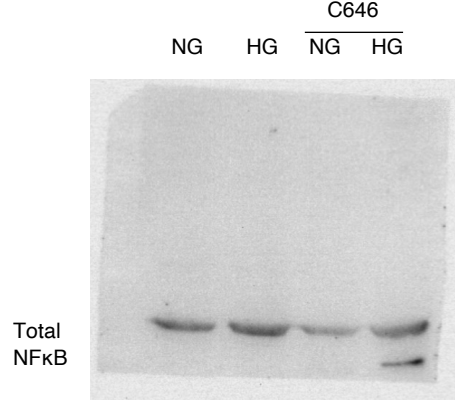

Immunoblotting images of ZEB2, βACTIN, pNFκB s536, and total NFκB protein in NG and HG Raw264.7 macrophages after treating with/without C646. NG, normoglycemia; HG, hyperglycemia.

Full unedited blot for Figure 5.D.

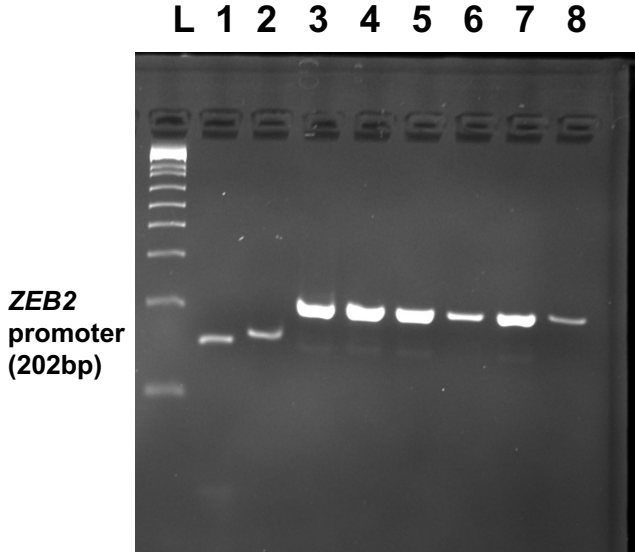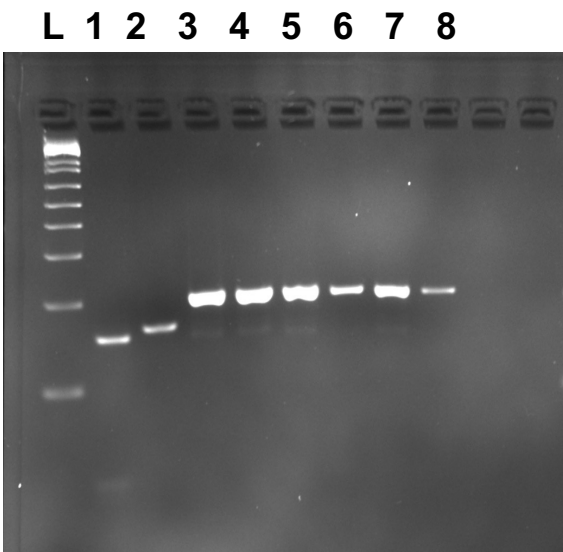

L-1Kb Ladder  
 1- Negative control  
 2- Positive control  
 3- Input NG  
 4- Input Vehicle + HG  
 6- Input C646 + HG  
 5- IP H3K9 NG  
 7- IP H3K9 Vehicle + HG  
 8- IP H3K9 C646 + HG

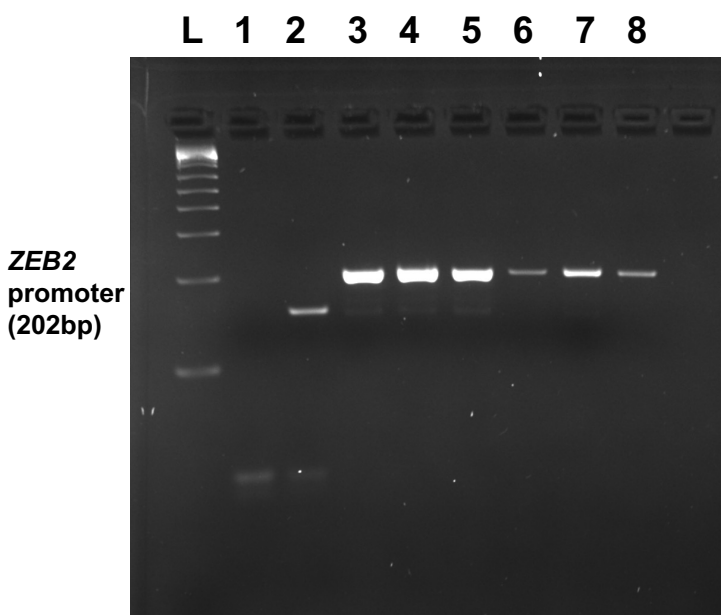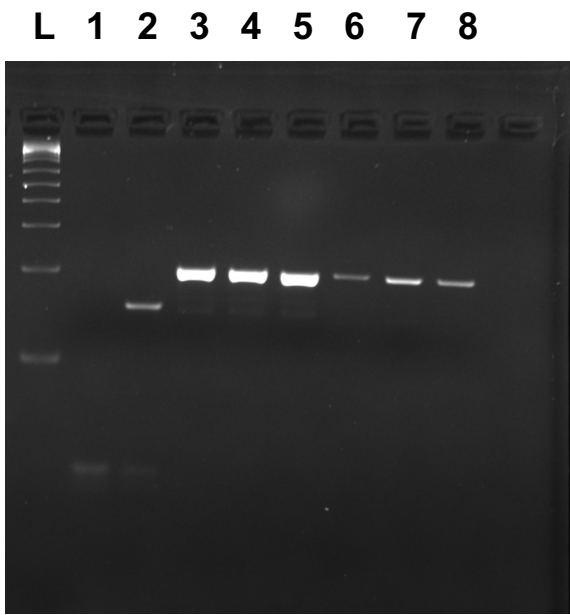

L-1Kb Ladder  
 1- Negative control  
 2- Positive control  
 3- Input NG  
 4- Input Vehicle + HG  
 5- Input C646 + HG  
 6- IP H3K27 NG  
 7- IP H3K27 Vehicle + HG  
 8- IP H3K27 C646 + HG

DNA agarose gel electrophoresis of *ZEB2* promoter in input and chromatin immuno-precipitation sample against H3K9Ac and H3K27Ac antibody from NG, HG + Vehicle, C646 + HG group. NG, normoglycemia; HG, hyperglycemia.

# Full unedited blot for Figure 5.H.

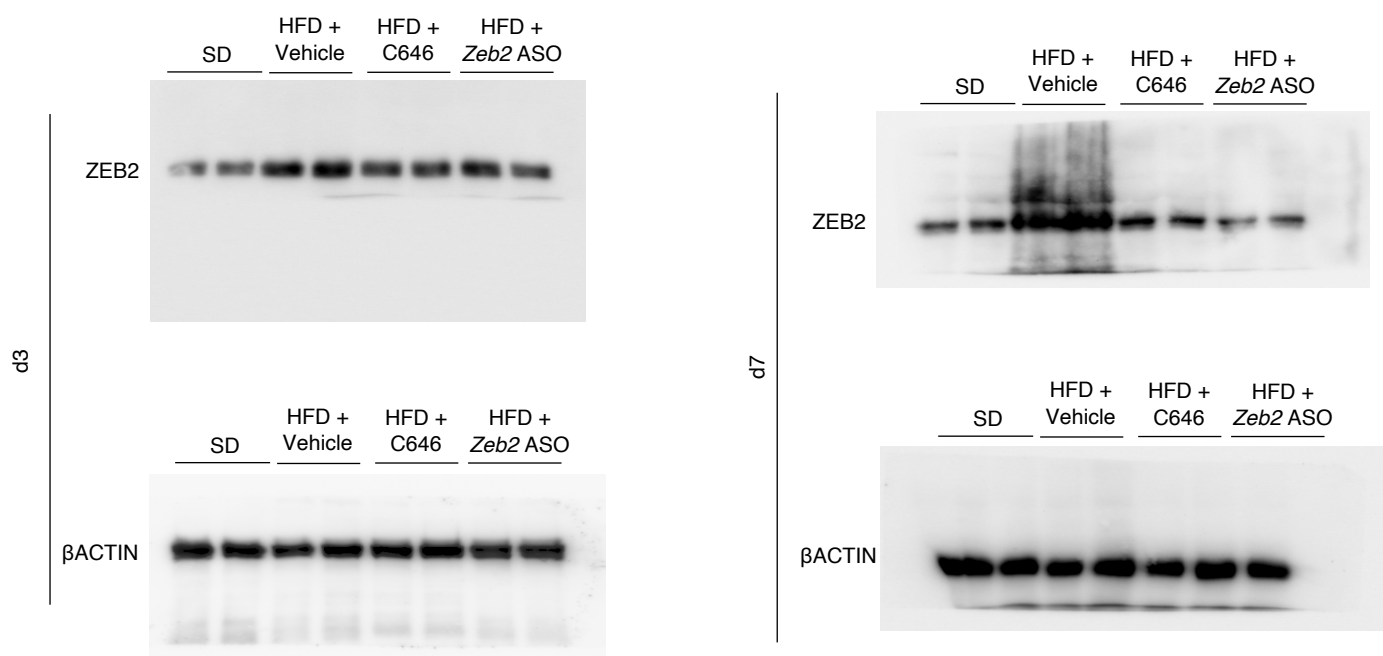

Immunoblotting images of ZEB2, and  $\beta$ ACTIN in SD, HFD + Vehicle, HFD + C646, and HFD + *Zeb2* ASO mice wound tissue at d3 and d7. SD, standard diet; HFD, high fat diet.

# Full unedited blot for Figure S6.F.

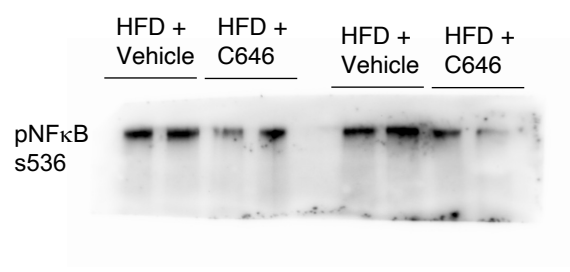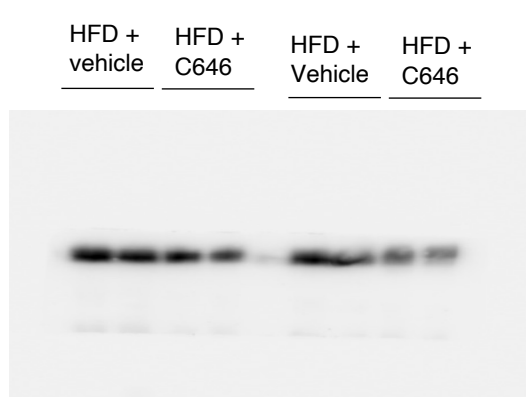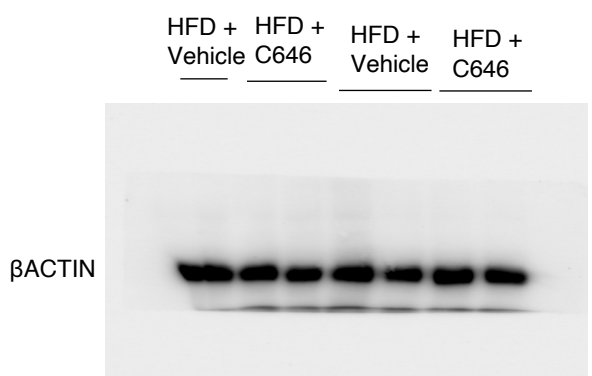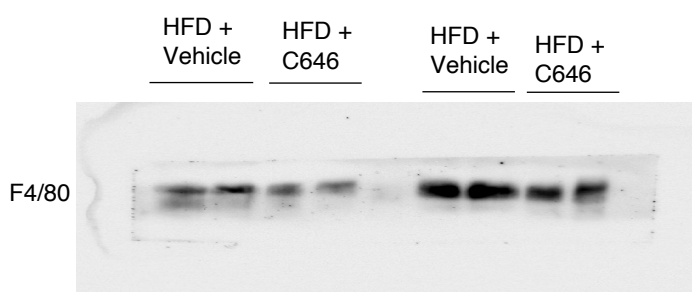

Immunoblotting images of ZEB2, and βACTIN in SD, HFD + Vehicle, HFD + C646, and HFD + *Zeb2* ASO mice wound tissue at d7. SD, standard diet; HFD, high fat diet.
